# Supplementary material
Source: PubMed Central journal article supplement (PMC6290163)
Supplement: supp_RA118.002532_136160_1_supp_203576_pf5l1n.pdf [file supp_RA118.002532_136160_1_supp_203576_pf5l1n.pdf]

## Supporting information

The wheat ABC transporter Lr34 modifies the lipid environment at the plasma membrane

**Johannes P. Deppe<sup>1</sup>, Ritta Rabbat<sup>1</sup>, Stefan Hörtensteiner<sup>1</sup>, Beat Keller<sup>1</sup>, Enrico Martinoia<sup>1</sup> and Rosa L. López-Marqués<sup>2\*</sup>**

<sup>1</sup>Department of Plant and Microbial Biology, University of Zürich (UZH), Zollikerstrasse 107, 8008 Zürich, Switzerland

<sup>2</sup>Department of Plant and Environmental Sciences, University of Copenhagen, Thorvaldsensvej 40, DK-1871 Frederiksberg C, Denmark

\*To whom correspondence should be addressed: Johannes Deppe, Institute of Plant and Microbial Biology, University of Zürich (UZH), 8008 Zürich, Switzerland; Telephone: +41 (0)44 63 48211; E-mail: johannes.deppe@botinst.uzh.ch or Rosa L. López-Marqués, Department of Plant and Environmental Sciences, University of Copenhagen, DK-1871 Frederiksberg C, Denmark; Telephone: +45-35332602; E-mail: rlo@plen.ku.dk

Contains Figure S1

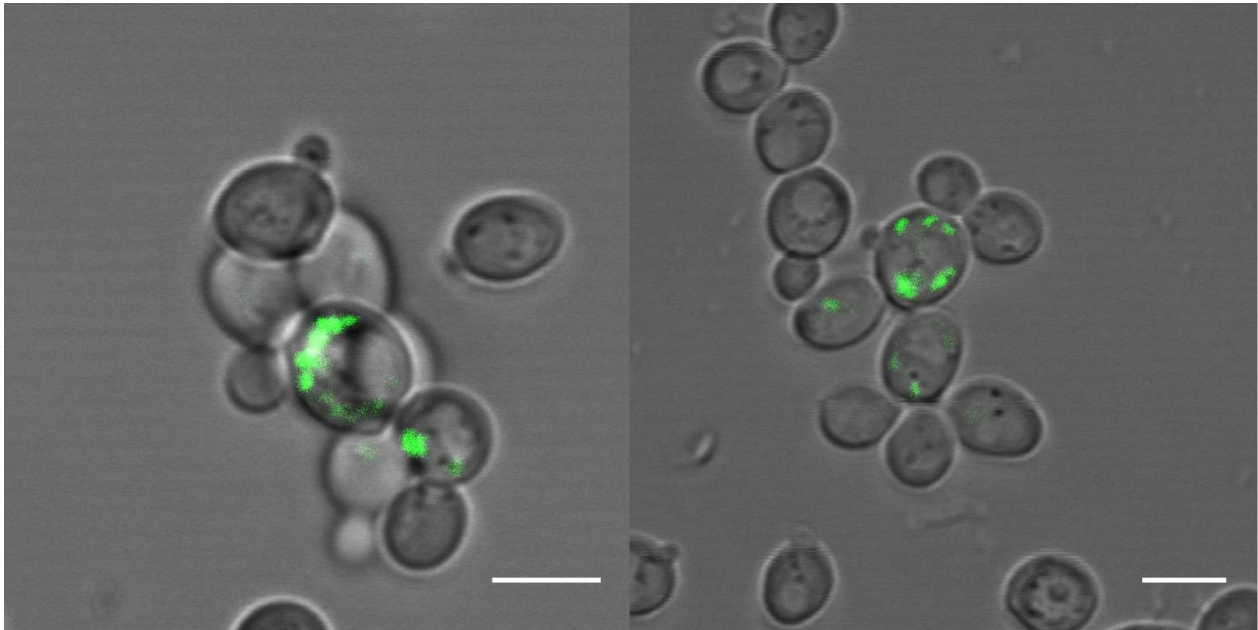

**Figure S1 Localization of Lr34 in yeast BY4741 wt cells** | Yeast cells transformed with a plasmids for the expression of GFP-tagged Lr34res (left) and Lr34sus (right), respectively, were grown to exponential growth phase ( $OD_{600}=1-2$ ) and analyzed by fluorescence microscopy to detect GFP-tagged Lr34 protein. Scale bars, 5  $\mu\text{m}$ .
